# Supplementary material for: Environmental factors, but not abundance and diversity of nitrifying microorganisms, explain sediment nitrification rates in Yangtze lakes
Source: Royal Society of Chemistry journal article supplement (doi:10.1039/c7ra11956a), 2018-01-01
Supplement: c7ra11956a1.pdf [file c7ra11956a1.pdf]

1 **Supporting Information**

2 **Fig. S1** Conceptual model identifying the expected direct and indirect pathways for  
3 catchment land uses and local factors to affect sediment potential nitrification.

4 **Fig. S2** Relationships between sediment potential nitrification rate and nitrifying  
5 community structure (N=35).

6 **Table S1** Water quality, sediment properties, and submerged vegetation  
7 characteristics of 35 sampling sites belonging to 10 Yangtze lakes.

8 **Table S2** Pearson correlation coefficients between catchment land uses and local  
9 water quality, sediment properties and submerged vegetation characteristics (N=35).

10 **Table S3** Sediment potential nitrification rate and nitrifying community structure of  
11 35 sampling sites belonging to 10 Yangtze lakes.

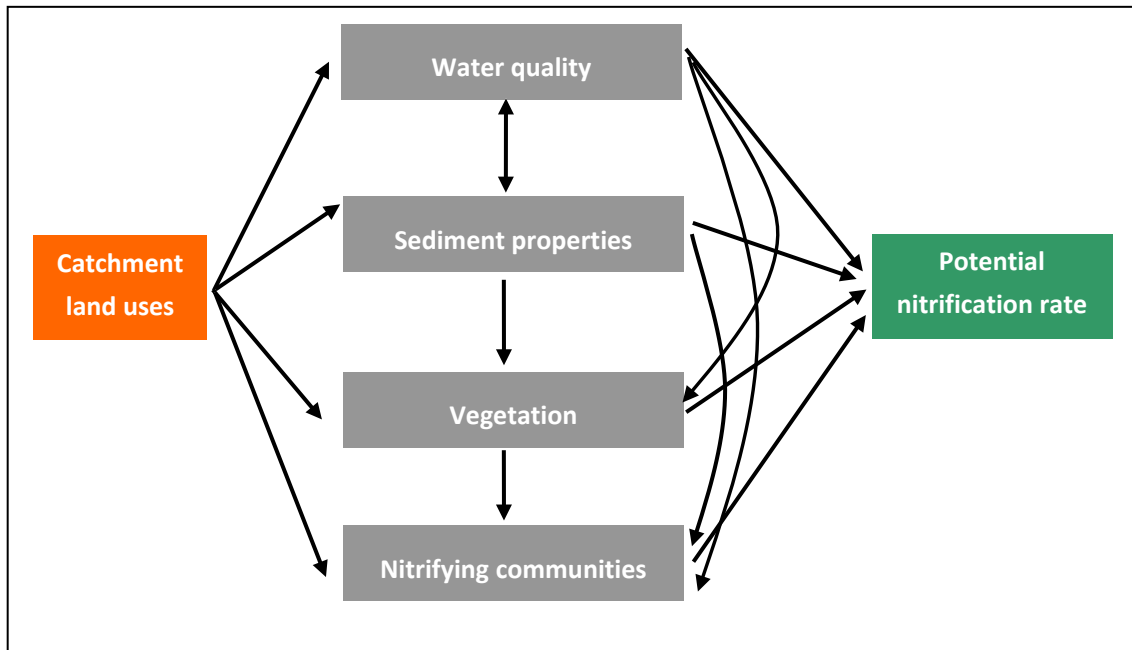

**Fig. S1**

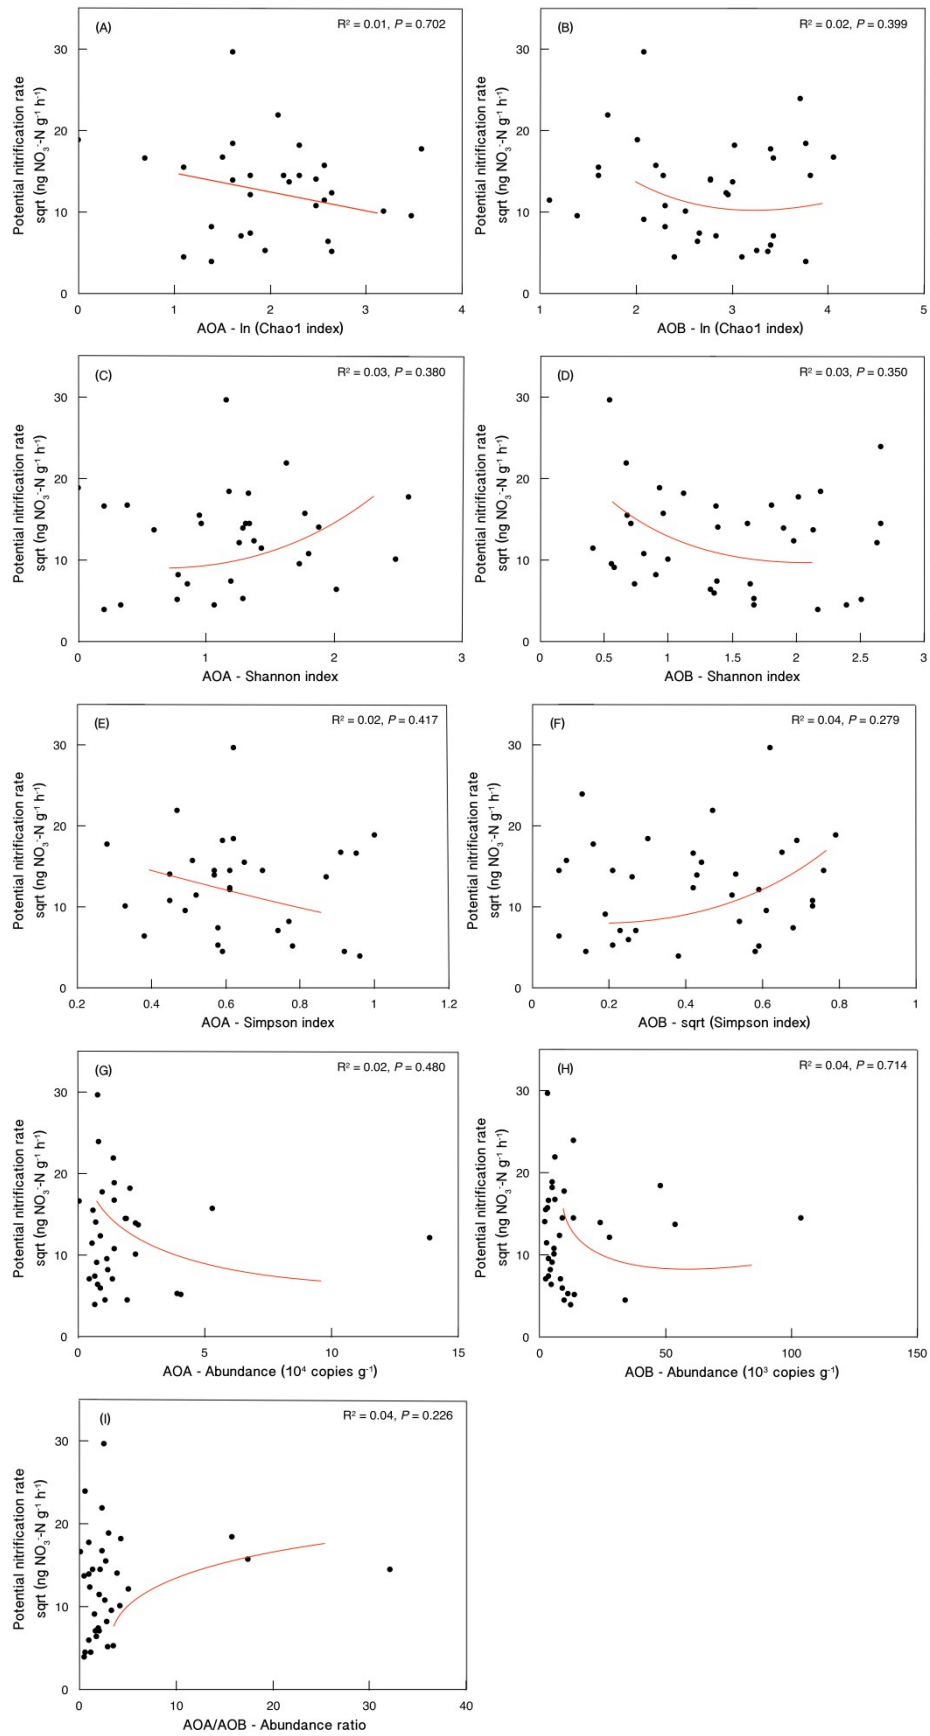

Fig. S2

**Table S1** Water quality, sediment properties, and submerged vegetation characteristics of 35 sampling sites belonging to 10 Yangtze lakes.

|      | Depth<br>(m) | SD<br>(m) | TOC<br>(mg L <sup>-1</sup> ) | TN<br>(mg L <sup>-1</sup> ) | TP<br>(mg L <sup>-1</sup> ) | Chl- <i>a</i><br>(mg m <sup>-3</sup> ) | TSI   | Moisture<br>(%) | Density<br>(g cm <sup>-3</sup> ) | STC<br>(mg g <sup>-1</sup> ) | STN<br>(mg g <sup>-1</sup> ) | NH <sub>4</sub> <sup>+</sup><br>(mg kg <sup>-1</sup> ) | NO <sub>3</sub> <sup>-</sup><br>(mg kg <sup>-1</sup> ) | Richness | Biomass<br>(g m <sup>-2</sup> ) |
|------|--------------|-----------|------------------------------|-----------------------------|-----------------------------|----------------------------------------|-------|-----------------|----------------------------------|------------------------------|------------------------------|--------------------------------------------------------|--------------------------------------------------------|----------|---------------------------------|
| BJH1 | 2.00         | 0.20      | 7.97                         | 0.70                        | 0.13                        | 74.97                                  | 76.74 | 56.00           | 1.35                             | 20.90                        | 1.68                         | 0.6                                                    | 0.35                                                   | 0        | 0                               |
| BJH2 | 2.50         | 0.20      | 6.15                         | 1.59                        | 0.15                        | 78.77                                  | 77.71 | 62.08           | 1.25                             | 25.50                        | 2.10                         | 0.63                                                   | 0.36                                                   | 0        | 0                               |
| BJH3 | 2.00         | 0.20      | 7.20                         | 0.56                        | 0.10                        | 69.36                                  | 75.16 | 57.60           | 1.50                             | 12.70                        | 1.30                         | 0.82                                                   | 0.14                                                   | 0        | 0                               |
| CH1  | 2.80         | 1.00      | 5.22                         | 0.57                        | ND                          | 10.21                                  | 56.68 | 70.89           | 1.05                             | 11.60                        | 1.18                         | 0.92                                                   | 0.13                                                   | 2        | 469                             |
| CH2  | 3.50         | 1.10      | 4.90                         | 1.34                        | 0.00                        | ND                                     | 41.91 | 63.62           | 1.17                             | 13.90                        | 1.29                         | 1.02                                                   | 0.37                                                   | 3        | 839                             |
| CH3  | 2.00         | 1.20      | 5.52                         | 1.13                        | ND                          | 5.76                                   | 52.56 | 73.32           | 1.14                             | 28.40                        | 1.40                         | 0.65                                                   | 0.08                                                   | 3        | 195                             |
| CH4  | 3.50         | 1.10      | 6.25                         | 1.06                        | ND                          | 11.72                                  | 56.67 | 77.44           | 1.42                             | 35.20                        | 1.51                         | 0.81                                                   | 0.04                                                   | 1        | 613                             |
| DH1  | 1.70         | 0.30      | 7.14                         | 1.23                        | 0.18                        | 45.54                                  | 74.86 | 46.39           | 1.39                             | 26.50                        | 1.66                         | 0.57                                                   | 0.3                                                    | 0        | 0                               |
| DH2  | 4.00         | 0.20      | 10.93                        | 0.92                        | 0.40                        | 63.15                                  | 81.69 | 55.82           | 1.52                             | 25.70                        | 1.58                         | 1.22                                                   | 1.8                                                    | 0        | 0                               |
| DH3  | 2.20         | 0.40      | 8.03                         | 1.72                        | 0.51                        | 50.37                                  | 78.80 | 67.87           | 1.34                             | 60.40                        | 3.55                         | 0.89                                                   | 0.77                                                   | 0        | 0                               |
| DSH1 | 2.00         | 0.50      | 7.78                         | 2.13                        | 0.15                        | 12.26                                  | 67.09 | 57.88           | 1.31                             | 8.80                         | 1.21                         | 2.31                                                   | 0.28                                                   | 0        | 0                               |
| DSH2 | 3.20         | 0.40      | 7.70                         | 2.11                        | 0.14                        | 15.46                                  | 68.53 | 53.19           | 1.42                             | 9.10                         | 1.20                         | 0.61                                                   | 0.71                                                   | 0        | 0                               |
| DSH3 | 2.80         | 0.90      | 8.86                         | 1.08                        | 0.22                        | 2.11                                   | 60.38 | 70.90           | 1.48                             | 8.80                         | .98                          | 0.57                                                   | 0.49                                                   | 0        | 0                               |
| GCH1 | 1.90         | 0.90      | 7.45                         | 0.79                        | 0.04                        | 10.95                                  | 57.52 | 64.27           | 1.17                             | 26.30                        | 2.09                         | 0.98                                                   | 0.05                                                   | 4        | 665                             |
| GCH2 | 3.00         | 1.00      | 7.52                         | 1.08                        | 0.02                        | 22.75                                  | 56.98 | 71.21           | 1.07                             | 26.00                        | 2.23                         | 0.75                                                   | 1.66                                                   | 2        | 70                              |
| GCH3 | 2.60         | 0.90      | 7.72                         | 1.19                        | 0.03                        | 33.24                                  | 60.09 | 71.95           | 1.31                             | 14.40                        | 1.43                         | 0.66                                                   | 0.25                                                   | 2        | 1019                            |
| GCH4 | 1.80         | 0.80      | 7.08                         | 0.96                        | 0.03                        | 24.14                                  | 59.61 | 64.81           | 1.18                             | 17.00                        | 1.78                         | 0.71                                                   | 0.11                                                   | 5        | 733                             |
| HOH1 | 2.00         | 1.40      | 7.61                         | 0.84                        | 0.00                        | 19.65                                  | 46.71 | 73.88           | 1.17                             | 52.20                        | 4.21                         | 0.84                                                   | 0.14                                                   | 4        | 1858                            |
| HOH2 | 2.10         | 1.50      | 7.43                         | 0.83                        | 0.00                        | 19.80                                  | 46.40 | 65.20           | 1.08                             | 56.90                        | 3.84                         | 1.9                                                    | 0.06                                                   | 3        | 2640                            |
| HOH3 | 2.20         | 1.20      | 8.15                         | 0.72                        | 0.00                        | 16.51                                  | 36.03 | 66.85           | 1.06                             | 35.80                        | 2.11                         | 0.89                                                   | ND                                                     | 4        | 818                             |

|      |      |      |      |      |      |       |       |       |      |        |      |      |      |   |      |
|------|------|------|------|------|------|-------|-------|-------|------|--------|------|------|------|---|------|
| H0H4 | 1.50 | 1.10 | 7.96 | 0.82 | 0.02 | 11.16 | 52.29 | 73.46 | 1.26 | 35.40  | 2.19 | 0.92 | 0.23 | 4 | 1380 |
| HUH1 | 1.60 | 0.60 | 6.28 | 1.05 | 0.14 | 17.38 | 66.96 | 57.77 | 1.38 | 16.40  | 1.09 | 0.86 | 0.54 | 0 | 0    |
| HUH2 | 1.50 | 0.60 | 6.19 | 1.29 | 0.19 | 46.90 | 71.72 | 48.38 | 1.47 | 22.30  | 2.10 | 0.7  | 0.24 | 0 | 0    |
| HUH3 | 2.00 | 0.70 | 6.57 | 1.03 | 0.22 | 34.94 | 70.93 | 59.31 | 1.39 | 24.00  | 2.16 | 0.68 | 0.17 | 0 | 0    |
| JSH1 | 3.20 | 0.45 | 3.92 | 0.64 | 0.06 | 31.96 | 66.29 | 57.30 | 1.34 | 5.60   | 1.00 | 0.83 | 0.07 | 0 | 0    |
| JSH2 | 2.60 | 0.60 | 3.67 | 0.63 | 0.04 | 11.76 | 59.20 | 55.32 | 1.43 | 11.90  | 1.63 | 0.63 | 0.33 | 0 | 0    |
| JSH3 | 2.20 | 0.65 | 3.94 | 0.68 | 0.04 | 15.46 | 60.21 | 59.08 | 1.28 | 12.60  | 1.63 | 1.3  | 1.54 | 0 | 0    |
| TH1  | 1.30 | 1.00 | 5.53 | 0.79 | 0.02 | 6.50  | 52.89 | 72.79 | 1.27 | 11.90  | 1.24 | 0.91 | 2.35 | 5 | 1182 |
| TH2  | 1.30 | 1.20 | 6.11 | 1.16 | 0.03 | 2.88  | 50.71 | 63.34 | 1.18 | 11.10  | 1.35 | 0.7  | 0.29 | 7 | 957  |
| TH3  | 1.10 | 1.10 | 5.61 | 0.98 | 0.01 | 1.38  | 44.12 | 72.20 | 1.06 | 10.10  | 1.15 | 0.73 | 0.11 | 6 | 2375 |
| TH4  | 1.20 | 1.00 | 5.72 | 0.87 | 0.01 | 2.67  | 44.87 | 76.37 | 1.15 | 13.50  | 1.56 | 0.8  | 0.12 | 5 | 1595 |
| XLH1 | 2.00 | 1.90 | 5.63 | 0.70 | 0.04 | 16.52 | 55.27 | 70.75 | 1.13 | 60.40  | 4.36 | 1.18 | 0.47 | 6 | 1050 |
| XLH2 | 2.10 | 1.30 | 6.46 | 0.51 | 0.03 | 26.60 | 56.96 | 56.97 | 1.05 | 104.20 | 6.03 | 0.59 | 0.39 | 4 | 284  |
| XLH3 | 2.20 | 1.00 | 5.89 | 0.57 | 0.03 | 31.16 | 58.74 | 70.68 | 1.02 | 83.70  | 6.29 | 1.01 | 1.63 | 3 | 1668 |
| XLH4 | 1.80 | 1.50 | 6.40 | 0.54 | 0.04 | 19.19 | 56.40 | 78.72 | 1.05 | 48.50  | 3.42 | 0.91 | 0.81 | 3 | 385  |

BJH: Lake Bajiaohu; CH: Lake Cihu; DH: Lake Donghu; DSH: Lake Dianshanhu; GCH: Lake Guchenghu; H0H: Lake Honghu; HUH: Lake Huahu; JSH: Lake Junshanhu; TH: Lake Taihu (East Taihu); XLH: Lake Xilianghu.

ND: no data; See Table 1 for the abbreviations.

**Table S2** Pearson correlation coefficients between catchment land uses and local water quality, sediment properties and submerged vegetation characteristics (N=35).

|                              | <b>Catchment<br/>agriculture</b> | <b>Catchment built-up<br/>land</b> | <b>Catchment<br/>vegetation</b> |
|------------------------------|----------------------------------|------------------------------------|---------------------------------|
| Depth                        | 0.16                             | -0.22                              | 0.02                            |
| SD                           | -0.04                            | -0.27                              | 0.03                            |
| TOC                          | 0.63**                           | 0.10                               | -0.41*                          |
| TN                           | 0.42*                            | 0.45**                             | -0.27                           |
| TP                           | 0.34                             | 0.11                               | -0.06                           |
| Chl- <i>a</i>                | -0.02                            | -0.31                              | 0.10                            |
| TSI                          | -0.07                            | 0.12                               | 0.10                            |
| Moistur                      | 0.02                             | -0.11                              | 0.05                            |
| Density                      | 0.15                             | 0.30                               | -0.17                           |
| STC                          | 0.12                             | -0.60**                            | 0.06                            |
| STN                          | -0.12                            | -0.43**                            | 0.07                            |
| NH <sub>4</sub> <sup>+</sup> | 0.24                             | 0.02                               | -0.31                           |
| NO <sub>3</sub> <sup>-</sup> | -0.13                            | 0.13                               | 0.08                            |
| Richness                     | -0.09                            | -0.05                              | 0.14                            |
| Biomass                      | 0.16                             | -0.09                              | -0.16                           |

\*  $P < 0.05$ ; \*\*  $P < 0.01$ ; See Table 1 for the abbreviations.

**Table S3** Sediment potential nitrification rate and nitrifying community structure of 35 sampling sites belonging to 10 Yangtze lakes.

|      | AOA                                                                                                   |       |         |         | AOB                                                    |       |         |         | AOA/AOB                                                |                 |
|------|-------------------------------------------------------------------------------------------------------|-------|---------|---------|--------------------------------------------------------|-------|---------|---------|--------------------------------------------------------|-----------------|
|      | Potential nitrification rate<br>(ng NO <sub>3</sub> <sup>-</sup> -N g <sup>-1</sup> h <sup>-1</sup> ) | Chao1 | Shannon | Simpson | Abundance<br>(10 <sup>4</sup> copies g <sup>-1</sup> ) | Chao1 | Shannon | Simpson | Abundance<br>(10 <sup>4</sup> copies g <sup>-1</sup> ) | Abundance ratio |
| BJH1 | 209.3                                                                                                 | 8.50  | 1.34    | 0.33    | 333.34                                                 | 45.00 | 2.66    | 0.10    | 10.37                                                  | 32.15           |
| BJH2 | 339.7                                                                                                 | 5.00  | 1.18    | 0.38    | 75.13                                                  | 43.50 | 2.19    | 0.14    | 4.77                                                   | 15.74           |
| BJH3 | 145.7                                                                                                 | 6.00  | 1.26    | 0.37    | 13.87                                                  | 19.25 | 2.63    | 0.07    | 2.75                                                   | 5.04            |
| CH1  | 27.5                                                                                                  | 7.00  | 1.29    | 0.33    | 3.90                                                   | 26.00 | 1.67    | 0.30    | 1.11                                                   | 3.52            |
| CH2  | 101.0                                                                                                 | 24.00 | 2.48    | 0.11    | 2.28                                                   | 12.33 | 1.00    | 0.59    | 0.55                                                   | 4.17            |
| CH3  | 20.2                                                                                                  | 3.00  | 1.06    | 0.34    | 1.07                                                   | 11.00 | 1.67    | 0.21    | 0.95                                                   | 1.12            |
| CH4  | 82.6                                                                                                  | ND    | ND      | ND      | 0.73                                                   | 8.00  | 0.58    | 0.73    | 0.49                                                   | 1.51            |
| DH1  | 187.6                                                                                                 | 9.00  | 0.59    | 0.75    | 2.39                                                   | 20.00 | 2.13    | 0.14    | 5.36                                                   | 0.45            |
| DH2  | 192.5                                                                                                 | 5.00  | 1.29    | 0.32    | 2.26                                                   | 16.00 | 1.90    | 0.19    | 2.40                                                   | 0.94            |
| DH3  | 210.5                                                                                                 | 6.00  | 0.96    | 0.49    | 1.85                                                   | 9.75  | 1.62    | 0.26    | 1.32                                                   | 1.40            |
| DSH1 | 54.7                                                                                                  | 6.00  | 1.19    | 0.34    | 0.64                                                   | 14.33 | 1.38    | 0.43    | 0.32                                                   | 1.99            |
| DSH2 | 153.4                                                                                                 | 14.00 | 1.37    | 0.37    | 0.87                                                   | 19.00 | 1.98    | 0.21    | 0.78                                                   | 1.11            |
| DSH3 | 49.5                                                                                                  | 5.50  | 0.85    | 0.55    | 0.45                                                   | 17.00 | 0.74    | 0.68    | 0.22                                                   | 2.02            |
| GCH1 | 275.6                                                                                                 | 2.00  | 0.20    | 0.90    | 0.02                                                   | 31.00 | 1.37    | 0.42    | 0.35                                                   | 0.06            |
| GCH2 | 49.5                                                                                                  | ND    | ND      | ND      | 1.36                                                   | 31.00 | 1.64    | 0.27    | 0.81                                                   | 1.67            |
| GCH3 | 41.2                                                                                                  | 13.50 | 2.02    | 0.15    | 0.75                                                   | 14.00 | 1.33    | 0.42    | 0.43                                                   | 1.74            |
| GCH4 | 315.4                                                                                                 | 36.00 | 2.58    | 0.08    | 0.96                                                   | 30.00 | 2.02    | 0.23    | 0.96                                                   | 1.00            |
| HOH1 | 571.4                                                                                                 | ND    | ND      | ND      | 0.79                                                   | 41.00 | 2.66    | 0.07    | 1.32                                                   | 0.60            |
| HOH2 | 15.7                                                                                                  | 4.00  | 0.20    | 0.92    | 0.64                                                   | 43.50 | 2.17    | 0.16    | 1.22                                                   | 0.52            |

|      |       |       |      |      |      |       |      |      |      |       |
|------|-------|-------|------|------|------|-------|------|------|------|-------|
| HOH3 | 20.6  | 3.00  | 0.33 | 0.84 | 1.93 | 22.14 | 2.39 | 0.13 | 3.36 | 0.57  |
| HOH4 | 35.2  | ND    | ND   | ND   | 0.87 | 30.00 | 1.36 | 0.38 | 0.90 | 0.97  |
| HUH1 | 66.9  | 4.00  | 0.78 | 0.59 | 1.16 | 10.00 | 0.90 | 0.58 | 0.41 | 2.85  |
| HUH2 | 277.8 | 4.50  | 0.38 | 0.84 | 1.41 | 58.00 | 1.81 | 0.25 | 0.60 | 2.35  |
| HUH3 | 355.0 | 1.00  | 0.00 | 1.00 | 1.41 | 7.50  | 0.93 | 0.54 | 0.47 | 3.03  |
| JSH1 | 116.1 | 12.00 | 1.80 | 0.20 | 1.44 | 10.00 | 0.81 | 0.65 | 0.56 | 2.59  |
| JSH2 | 132.0 | 13.00 | 1.43 | 0.27 | 0.54 | 3.00  | 0.41 | 0.79 | 0.26 | 2.05  |
| JSH3 | 90.3  | 32.00 | 1.73 | 0.24 | 1.14 | 4.00  | 0.56 | 0.73 | 0.35 | 3.30  |
| TH1  | 246.3 | 13.00 | 1.77 | 0.26 | 5.30 | 9.00  | 0.96 | 0.52 | 0.30 | 17.43 |
| TH2  | 239.5 | 3.00  | 0.95 | 0.42 | 0.59 | 5.00  | 0.68 | 0.61 | 0.22 | 2.72  |
| TH3  | 26.6  | 14.00 | 0.77 | 0.60 | 4.05 | 29.00 | 2.51 | 0.09 | 1.37 | 2.96  |
| TH4  | 197.6 | 12.00 | 1.88 | 0.20 | 0.68 | 16.00 | 1.39 | 0.44 | 0.17 | 3.91  |
| XLH1 | 210.0 | 10.00 | 1.31 | 0.37 | 1.90 | 5.00  | 0.71 | 0.59 | 0.90 | 2.12  |
| XLH2 | 331.4 | 10.00 | 1.33 | 0.35 | 2.03 | 20.50 | 1.12 | 0.53 | 0.47 | 4.30  |
| XLH3 | 876.4 | 5.00  | 1.16 | 0.38 | 0.77 | 8.00  | 0.54 | 0.76 | 0.31 | 2.52  |
| XLH4 | 478.8 | 8.00  | 1.63 | 0.22 | 1.38 | 5.50  | 0.67 | 0.69 | 0.59 | 2.33  |

BJH: Lake Bajiaohu; CH: Lake Cihu; DH: Lake Donghu; DSH: Lake Dianshanhu; GCH: Lake Guchenghu; HOH: Lake Honghu; HUH: Lake Huahu; JSH: Lake Junshanhu;

TH: Lake Taihu (East Taihu); XLH: Lake Xilianghu.

ND: no data.
